# Supplementary material for: Thoracic surgery in Brazil: an overview
Source: PubMed Central journal article supplement — J Thorac Dis. 2022 Aug;14(8):3083–90. doi: 10.21037/jtd-21-1809 (PMC9442544; doi:10.21037/jtd-21-1809), 2022-08
Supplement: jtd-14-08-3083-prf.pdf [file jtd-14-08-3083-prf.pdf]

Peer Review File

Article information: <https://dx.doi.org/10.21037/jtd-21-1809>.

**Reviewer A:**

Comment 1: Thanks for submitting to our attention your paper. It's a very interesting review that provides a fantastic overview about thoracic surgery in Brazil.

-Since you stated that "Since then, the database of the Brazilian Society of Thoracic Surgery has been officially established and the numbers are increasing year after year" could you please maybe report how many procedures (anatomical resection) are performed roughly every year (%open, % VATS, % RATS)? Do you have this data?

Reply 1: We have added this information (see page 11, line 23)

Comment 2: Reference 11 is missing in the reference list.

Reply 2: Already corrected within the updated text. Actually this reference became #12, since we added another reference as #11 (see page 19, line 3).

**Reviewer B:**

Comment 1: Thank you to the authors for this very enlightening summary and informative comprehensive review on the state of thoracic surgery in Brazil. I learned a lot about your system public and private and also about social demographic disparities. You should be commended on how far thoracic surgery has come in your country.

Reply 1: Thank you for your kind comments

Just a few questions for the authors:

Comment 2: What is the estimated percentage of minimally invasive vs. OPEN thoracic surgery is currently being done in Brazil

Reply 2: We have added this information (see page 11, line 23)

Comment 3: How about for academic centers versus rural areas?

Reply 3: We do not have this data available (see page 12, line 10)

Comment 4: Out of the large centralized centers what percentage of minimally invasive is VATS vs. RATS?

Reply 4: We do not have this data available (see page 12, line 10)

Comment 5: How many robots do you have at your hospital, and do you see the lack of robots and OR access to be an issue for the future?

Reply 5: We have added this information (see page 13, line 10)

Comment 6: What do the authors think can be the "solution" for the social disparities for lack of superior care in the underserved area versus the academic centers?

Reply 6: It's a very difficult question to solve, with a broad wide answer (see page 15, line 16)

Comment 7: Has regionalized thoracic surgery centers been widely adopted in Brazil?

Reply 7: We do not have this data available (see page 10, line 5)

**Reviewer C:**

Comment: Thank you very much for giving me this precious opportunity to review this manuscript. This manuscript addresses the situation of Brazilian thoracic surgeon, health care system and medical access. This paper is important for understand them.

Reply: Thank you for your kind comments
